1 **Title**

2 Navigating vaccination choices: The intersecting dynamics of institutional trust, belonging and  
3 message perception among Congolese migrants in the UK (A reflexive thematic analysis)

4

5 **Authors**

6 Alison F Crawshaw\* [acrawsha@sgul.ac.uk](mailto:acrawsha@sgul.ac.uk)

7 Tushna Vandrevala [t.vandrevala@kingston.ac.uk](mailto:t.vandrevala@kingston.ac.uk)

8 Felicity Knights [fknight@sgul.ac.uk](mailto:fknight@sgul.ac.uk)

9 Anna Deal [adeal@sgul.ac.uk](mailto:adeal@sgul.ac.uk)

10 Laura Muzinga Lutumba [hcwsg@outlook.com](mailto:hcwsg@outlook.com)

11 Sarah Nkembi [hcwsg@outlook.com](mailto:hcwsg@outlook.com)

12 Lusau Mimi Kitoko [hcwsg@outlook.com](mailto:hcwsg@outlook.com)

13 Caroline Hickey [caroline@hcvs.org.uk](mailto:caroline@hcvs.org.uk)

14 Alice S Forster [alice.forman@ourfuturehealth.org.uk](mailto:alice.forman@ourfuturehealth.org.uk)

15 Sally Hargreaves [s.hargreaves@sgul.ac.uk](mailto:s.hargreaves@sgul.ac.uk)

16

17 \*First and corresponding author

18

19 **Affiliations**

20 The Migrant Health Research Group, Institute for Infection and Immunity, St George's, University of  
21 London, Cranmer Terrace, London, SW17 0RE, UK (AFC, AD, SH, FK)

22

23 Hackney Refugee and Migrant Forum and Hackney CVS, The Adiaha Antigha Centre, 24-30 Dalston  
24 Lane, London, E8 3AZ (CH)

25

26 Hackney Congolese Women Support Group, c/o Hackney CVS, The Adiaha Antigha Centre, 24-30  
27 Dalston Lane, London, E8 3AZ (LML, SN, LMK)

28 Department of Public Health and Policy, London School of Hygiene and Tropical Medicine, London,

29 **UK (AP)**  
NOTE: This preprint reports new research that has not been certified by peer review and should not be used to guide clinical practice.

30

31 Centre for Applied Health and Social Care Research, Faculty of Health, Science, Social Care and  
32 Education, Kingston University London, UK (TC)

33

34 Our Future Health, New Bailey, 4 Stanley Street, Manchester, M3 5JL, UK (ASF)

35

## 36 **Abstract**

37

### 38 **Background**

39 The COVID-19 pandemic has disproportionately impacted intersectionally marginalised migrants,  
40 revealing systemic disparities in health outcomes and vaccine uptake. An in-depth understanding of  
41 the underlying social and structural factors influencing health behaviours is necessary to develop  
42 tailored interventions for migrants but has been seldom explored. Therefore, this qualitative study  
43 aimed to explore the contextual factors shaping COVID-19 vaccination decision-making among  
44 Congolese migrants in the UK.

45

### 46 **Methods**

47 A community-based participatory research study was designed and led by a community-academic  
48 partnership in London, UK (2021-2022). Peer-led, semi-structured interviews were conducted in  
49 Lingala with 32 adult Congolese migrants and explored beliefs, perceptions and lived experiences of  
50 migration, healthcare and vaccination and the pandemic. Reflexive thematic analysis generated two  
51 themes and a model conceptualising the vaccination decision-making process was developed.  
52 Participants and community partners were financially compensated, and the study received ethical  
53 approval from the University of London ethics committee (REC: 2021.0128).

54

### 55 **Findings**

56 Participants highlighted the incompatibility of lockdown restrictions with their communal culture, which  
57 intensified feelings of exclusion and alienation. Concerns about COVID-19 vaccination were attributed  
58 to safety and effectiveness, partly informed by experiences and legacies of discrimination and

59 exploitation of Black Africans. Inequality in the pandemic response and COVID-19 outcomes  
60 heightened participants' sense that their views and needs were being overlooked and government  
61 sources and information were perceived as coercive. Drawing on this data, our model depicts the  
62 interplay between institutional trust, belonging, and message perception which shaped participants'  
63 vaccination decisions and led to (non-)engagement with COVID-19 vaccination.

64

## 65 **Conclusion**

66 This research enhances understanding of how social and contextual factors may influence migrants'  
67 engagement with health interventions. It underscores the necessity of partnering with migrant  
68 communities to understand their needs in context and co-design tailored interventions and inclusive  
69 messaging strategies which foster trust and belonging. Implementing systemic changes to address  
70 structural inequalities will be crucial to create an environment that supports engagement with health-  
71 protective behaviours and enhances health outcomes among migrant communities.

72

## 73 **Key words**

74 MeSH keywords: Qualitative Research; Transients and Migrants; Refugees; Behavioral Medicine;  
75 Community-Based Participatory Research; Health Disparate, Minority and Vulnerable Populations;  
76 Healthcare Disparities  
77 Non-MeSH: COVID-19, vaccines, migrants, refugees, health inequalities, intervention development,  
78 participatory research, community health

## 79 Introduction

80

81 Migrants suffered disproportionately during the COVID-19 pandemic, facing heightened health risks  
82 (1-4), poorer health outcomes (1, 5-8) and lower vaccine uptake rates (9-15), compared to non-  
83 migrant communities. There is an urgent need to critically examine the structural factors underpinning  
84 these inequitable outcomes, to guide the design of inclusive interventions and policies which can  
85 advance health and vaccine equity. While trust has emerged as a key factor shaping vaccination  
86 decisions, especially among marginalised groups (16, 17), the intricate dynamics of trust within  
87 specific migrant communities, and the underlying structural and social determinants, remain relatively  
88 unexplored (18, 19) or oversimplified (19, 20). To bridge this knowledge gap, this participatory  
89 research study will explore the influence of context, lived experiences and notions of belonging on  
90 migrants' vaccination behaviour.

91

92 Trust can be understood as the confidence individuals have in their interactions with others,  
93 institutions, and societal systems (21), and is influenced by their beliefs, values and lived experiences.  
94 Several theoretical concepts can help us to understand how migrants conceptualise trust and feel  
95 connected to the world around them. Social identity theory (22, 23) and belonging (24) provide two  
96 means of understanding the range of processes, including perceptions, attitudes and behaviours, that  
97 can contribute to identity. The latter concept offers a more nuanced framework and proposes that  
98 belonging (a sense of being 'at home' (25), feeling safe and connected) is formed through diverse  
99 attachments and memberships that, when denied, lead to exclusion and marginalisation. One of the  
100 ways this exclusion manifests is through othering, a process of exclusion rooted in power dynamics  
101 (26, 27), and which is notably used as a political tool to evade responsibility for migrants and the  
102 globally displaced. In Australia, research with black African migrants and refugees living in  
103 Queensland highlighted the detrimental effects of othering practices and marginalisation on their  
104 sense of belonging to Australian society (28). Similarly, the emphasis on race and ethnicity as  
105 COVID-19 risk factors in the UK led to increased stigmatisation and alienation of individuals of Black  
106 African, Caribbean and South Asian descent during the pandemic (29). Crenshaw's intersectionality  
107 theory (30, 31) provides a lens through which to understand the layered exclusion faced by migrants,  
108 by considering their overlapping social categorisations or identities (for example, based on migrant

109 status, ethnicity, class and gender) and the interconnected systems of oppression, domination, or  
110 discrimination they create (31). Applying these concepts to our research may facilitate a more  
111 nuanced understanding of the context in which migrants' health and vaccination decisions are made,  
112 providing us with the insight to develop more responsive and tailored interventions.

113

114 Research in this area to date has been relatively siloed, focusing on migrants' constructions of  
115 belonging and identity, experiences of discrimination and marginalisation, or their health outcomes,  
116 but not causally linking these factors. Moreover, the overly simplistic explanation for behaviour based  
117 on "cultural differences" has been criticised for perpetuating and legitimising inequality relations (32).  
118 However, recent studies have begun to consider the wider context shaping migrants' health decision-  
119 making. A study among Black African and Caribbean communities in the UK, for example, found that  
120 the uncertainty of the pandemic, combined with contemporary and historical mistrust and a lack of  
121 identity-aligned messaging, contributed to belief in conspiracy theories and low engagement with  
122 COVID-19 health-protective behaviours (18, 29). A study in Japan found that the social integration of  
123 migrants positively correlated with their COVID-19 vaccine acceptance, underscoring the importance  
124 of inclusion and community engagement (33). Building on this recent work and the different  
125 understandings of these concepts, this study aims to explore the contextual factors shaping migrants'  
126 COVID-19 vaccination decision-making through an in-depth study with Congolese migrants in the UK.  
127 This approach moves beyond the limitations of the traditional 'information deficit model' (34),  
128 providing a comprehensive understanding of how migrants' unique contexts, worldviews and  
129 intersecting identities shape their attitudes towards and engagement with science (35), and paving the  
130 way for more tailored, culturally-embedded and inclusive interventions to address their unique needs.

131

## 132 **History of the Democratic Republic of the Congo and Congolese migration to the UK**

133

134 The Democratic Republic of Congo (DRC) has a complex history, with the Congolese people subject  
135 to exploitation, cultural repression, and systematic oppression under Belgian colonial rule from the  
136 late 19<sup>th</sup> to mid-20<sup>th</sup> Century. This era promoted harmful racial hierarchies and ideas of superiority of  
137 Europeans over Africans, while the economic exploitation of Congo's natural resources perpetuated a  
138 narrative of exploitation which continues to shape Congolese beliefs and values (36). The country's

139 struggle for independence from Belgian colonial rule is said to have fostered a sense of nationalism  
140 and pride among Congolese people (36). However, this period also exacerbated ethnic tensions  
141 between the country's more than 200 different ethnic groups, potentially creating a complex picture of  
142 identity (36).

143

144 In recent decades, Congolese migration to the UK has been spurred by political instability, armed  
145 conflicts, economic challenges, and human rights abuses in the DRC. Consequently, a significant  
146 proportion of Congolese migrants in the UK arrived as refugees and asylum seekers, and they were  
147 the fourth most common nationality resettled in the UK between 2010 and 2021 (1774 people).

148 Despite their complex history, relatively little is written about the Congolese diaspora in the UK. A  
149 2006 report by the International Organization for Migration highlighted specific challenges, including  
150 language barriers, cultural adjustments, discrimination, difficulties accessing key services (housing,  
151 healthcare, employment), and challenging asylum processes (37). These have led to prolonged  
152 periods of uncertainty, impacting their ability to integrate into UK society (37). The reported reliance of  
153 these communities on the support of Congolese community organisations and non-governmental  
154 organisations (37) gives further indication of the detrimental effects of these challenges on their sense  
155 of belonging and inclusion within UK society, potentially shaping their willingness and ability to  
156 engage with the wider system.

157

## 158 **Methods**

159

### 160 *Study design*

161

162 A community-based participatory research (CBPR) study was conducted with Congolese migrants in  
163 London, UK in 2021-2022, led by a community-academic partnership ('coalition', see below). This  
164 study originated from Congolese migrant community members identifying unmet needs and concerns  
165 around COVID-19 vaccination within their community, coupled with the academic partner's interest in  
166 exploring existing evidence gaps related to vaccination beliefs and behaviours among migrant  
167 populations (38-40). Within this CBPR study (reported elsewhere (41, 42)), qualitative, semi-  
168 structured in-depth interviews were conducted with Congolese migrants to explore their beliefs,

169 perceptions and lived experiences of migration and healthcare in the UK, the COVID-19 pandemic,  
170 and routine and COVID-19 vaccination. The coalition co-designed and pilot-tested the topic guide and  
171 jointly decided on the data collection approaches and all aspects of the study design. The Standards  
172 for Reporting Qualitative Research were followed (43).

173

#### 174 *Setting and population*

175

176 The study was set in Hackney, a diverse borough of London, UK, where over 89 languages are  
177 spoken and around 40% of the population come from Black and Minority Ethnic Groups, as defined by  
178 the UK Office for National Statistics (44). Hackney was the 11<sup>th</sup> most deprived local authority in  
179 England based on the Indices of Deprivation 2015 (45). It is thought to host one of the UK's larger  
180 populations of Congolese migrants (41, 46). A single nationality migrant group was involved for an in-  
181 depth, culturally situated understanding of the research topic, although it was recognised the sample  
182 differed across a variety of other criteria. The target population was Congolese adult migrants living in  
183 or around Hackney (specific inclusion/exclusion criteria are shown in Table 1).

184

185 **Table 1. Inclusion and exclusion criteria of study participants.**

| Inclusion criteria                                                                                                                                                                                                         | Exclusion criteria                                                                                                                                                                                                                                                                                                                           |
|----------------------------------------------------------------------------------------------------------------------------------------------------------------------------------------------------------------------------|----------------------------------------------------------------------------------------------------------------------------------------------------------------------------------------------------------------------------------------------------------------------------------------------------------------------------------------------|
| <ul style="list-style-type: none"><li>• Born in the Democratic Republic of Congo (DRC).</li><li>• Aged 18 or above.</li><li>• Currently residing in the UK.</li><li>• Willing and able to give informed consent.</li></ul> | <ul style="list-style-type: none"><li>• Not migrant as per earlier definition.</li><li>• Not born in the DRC.</li><li>• Below the age of 18.</li><li>• Temporarily in the UK for holiday, visiting friends/relatives, or other reasons.</li><li>• Lacking capacity to consent, as determined by the mental capacity act framework.</li></ul> |

186

#### 187 *Community-Academic Coalition*

188

189 The all-female coalition included an academic researcher with a background in community health  
190 research and lived experience of migration, three Congolese founders of a local community  
191 organisation in Hackney, with lived experience of migration and strong links with the local Congolese  
192 and Hackney communities, and an experienced community outreach coordinator from Hackney's

193 voluntary and community support sector agency. The coalition met regularly to allocate roles and  
194 responsibilities and plan the study (described elsewhere (41)). As the three Congolese members of  
195 the coalition expressed an interest in conducting the interviews but had no prior research experience,  
196 the academic researcher (AFC) trained them in qualitative interview techniques and study design and  
197 the outreach coordinator (CH) provided training in facilitation skills two months prior to starting the  
198 study. The team had ample time to learn and practice their skills through role-play and pilot testing the  
199 topic guides.

200

#### 201 *Participant selection and recruitment*

202

203 The study aimed to recruit approximately 30 adult migrants who met the specified inclusion criteria  
204 (see Table 1). Participants were recruited (14/01/22-18/03/22) by the Congolese members of the  
205 coalition (LML, LMK, SN) using co-designed flyers, word-of-mouth, and snowball sampling  
206 techniques. They received a participant information sheet explaining the study and their rights, which  
207 was also explained to them verbally, at least one week in advance of the interview, and had the  
208 opportunity to ask questions before deciding whether to participate.

209

#### 210 *Ethics and informed consent*

211

212 The study was approved by the St George's University of London Research Ethics Committee (REC  
213 reference 2021.0128). All participants provided written informed consent prior to participating.

214

#### 215 *Data collection*

216

217 Semi-structured in-depth interviews were conducted in January-March 2022 and were done face-to-  
218 face in private meeting rooms by four members of the coalition (AFC, LML, LMK, SN). CH provided  
219 logistical and project management support. Interviews were conducted in Lingala, French or English  
220 (LML, LMK, SN are tri-lingual, and AFC used a professional telephone interpreter as required; most  
221 interviews were done in Lingala) and lasted 15 – 50 minutes. Interviews explored experiences, beliefs  
222 and knowledge of vaccination (including COVID-19, routine, selective and catch-up vaccinations),



223 health-seeking behaviour, experiences of the NHS, preferred health information sources, and  
224 suggestions for improving health services. Topic guides were developed iteratively over the course of  
225 the study. Interviews were audio-recorded by Dictaphone and transcribed and translated verbatim by  
226 a professional translator. Transcripts were checked for accuracy and pseudonymised, and audio  
227 recordings were destroyed after transcription. Handwritten field notes were incorporated into final  
228 transcripts. Sociodemographic data were collected at the time of interviews from participants using a  
229 standardised form. Additional data and insights about the local, socio-cultural, and historical context,  
230 and Congolese culture, customs, and preferences were collected using optional poster walls which  
231 participants were invited to contribute to anonymously outside of interviews. Optional post-interview  
232 feedback forms were also collected. Participants received a £20 gift card for taking part and were  
233 reimbursed for travel costs and provided with childcare when required. Specific decisions were also  
234 made to encourage attendance and create a more welcoming and informal environment for  
235 participants, with the guidance of the Congolese coalition members. For example, interviews were  
236 held at a local community centre close to the local market, timed to coincide with market days, and  
237 organised as part of 'community days' celebrating Congolese culture, during which information was  
238 shared about local support services.

239

#### 240 *Data analysis and theoretical framework*

241

242 A six-stage reflexive thematic analysis (47, 48) was followed to explore patterns and subjective  
243 experiences across the dataset. A moderate constructivist theoretical framework (49) was used,  
244 recognising the roles of the researchers and participants in the co-construction of meaning (50).  
245 Theoretical flexibility meant the analysis could be informed by critical and social justice approaches  
246 concerned with 'giving voice' to the participants and their lived experiences and locating these within  
247 wider political, historical, and sociocultural discourses. Transcripts were uploaded into NVivo12  
248 software for qualitative analysis. The first author (AFC) completed stages 1-3, using a mixture of  
249 semantic and latent coding, and then discussed initial themes with the coalition (LML, LMK, SN, CH),  
250 TV and FK in a process of critical engagement to deepen the analysis, develop and refine themes  
251 (stages 4-5). During this stage, important patterns in the data relating to belongingness and identity  
252 were noted, which framed the onward analysis. Finally, a model was developed to theorise the links

253 within and across the dataset and showcase how individuals' lived experiences may lead to  
254 engagement with specific health behaviours. AFC had regular conversations with co-authors  
255 (particularly TV and FK) throughout the analytic process and kept reflexivity notes. These were crucial  
256 to the development of the final themes and model and ensured subjectivity was acknowledged.  
257 Several iterations of theme names and definitions were reviewed to ensure their clarity, scope, and  
258 fidelity to the overall storyline. Consequently, the four initial candidate themes were refined into the  
259 two final themes presented below.

260

261

## 262 **Findings (analysis and interpretation)**

263

264 Thirty-two participants were included in the study (descriptive characteristics are shown in Table 2), of  
265 whom most were female (24, 75%) and refugees or asylum seekers (19, 60%). The inclusion criteria  
266 were expanded during the study to include two (6%) participants who were born in Angola but  
267 identified as Congolese, recognising the geo-political limitations of the original criteria. Participants  
268 had a mean age of 52.6 years (standard deviation, SD, 11 years) and had lived in the UK for mean  
269 14.3 years (SD 7.5 years). Most spoke Lingala (28, 88%) or French (20, 63%); few spoke English (10,  
270 31%) and 15 (47%) considered themselves to have limited English proficiency (unable to read or  
271 write). All (100%) were registered with a GP.

272

273 **Table 2. Characteristics of qualitative interview participants (n=32).**

274

| Characteristic                 | n (%)              |
|--------------------------------|--------------------|
| Migrant status                 |                    |
| Seeking asylum                 | 6 (19%)            |
| Refugee                        | 13 (41%)           |
| British (naturalised)          | 6 (19%)            |
| Prefer not to say              | 5 (16%)            |
| Other visa                     | 2 (6%)             |
| <b>Age in years, mean (SD)</b> | <b>52.6 (11.0)</b> |
| 25-49                          | 13 (41%)           |
| 50-64                          | 15 (47%)           |

|                                                                                     |           |
|-------------------------------------------------------------------------------------|-----------|
| Over 65                                                                             | 4 (13%)   |
| <b>Gender</b>                                                                       |           |
| Female                                                                              | 24 (75%)  |
| Male                                                                                | 8 (25%)   |
| <b>Time since arrival in the UK (years), mean (SD)*</b>                             |           |
| 0-9                                                                                 | 6 (19%)   |
| 10+                                                                                 | 22 (69%)  |
| 20+                                                                                 | 9 (28%)   |
| Not available                                                                       | 2 (6%)    |
| <b>Country of birth</b>                                                             |           |
| Democratic Republic of Congo or Republic of Congo <sup>^</sup>                      | 30 (94%)  |
| Angola <sup>†</sup>                                                                 | 2 (6%)    |
| <b>Religion</b>                                                                     |           |
| Christianity                                                                        | 32 (100%) |
| <b>Marital status</b>                                                               |           |
| Single                                                                              | 18 (56%)  |
| Married                                                                             | 10 (31%)  |
| Other                                                                               | 4 (13%)   |
| <b>Currently have children &lt;16 years of age living in household</b>              |           |
| Yes                                                                                 | 15 (47%)  |
| <b>Languages spoken</b>                                                             |           |
| Lingala                                                                             | 28 (88%)  |
| French                                                                              | 20 (63%)  |
| English                                                                             | 10 (31%)  |
| Other (Kikongo, Portuguese)                                                         | 3 (9%)    |
| <b>Limited English proficiency (self-reported, cannot read or write in English)</b> |           |
| Yes                                                                                 | 15 (47%)  |
| No                                                                                  | 14 (44%)  |
| No response                                                                         | 3 (9%)    |
| <b>Registered with GP</b>                                                           |           |
| Yes                                                                                 | 32 (100%) |

275

276 The analysis generated two themes, which informed the model depicted in Figure 1. The model aims

277 to theorise the engagement or non-engagement with health-protective behaviours, in this case

278 COVID-19 vaccination, of Congolese migrants by considering the influence of context and lived

279 experiences on their health decision-making.

280

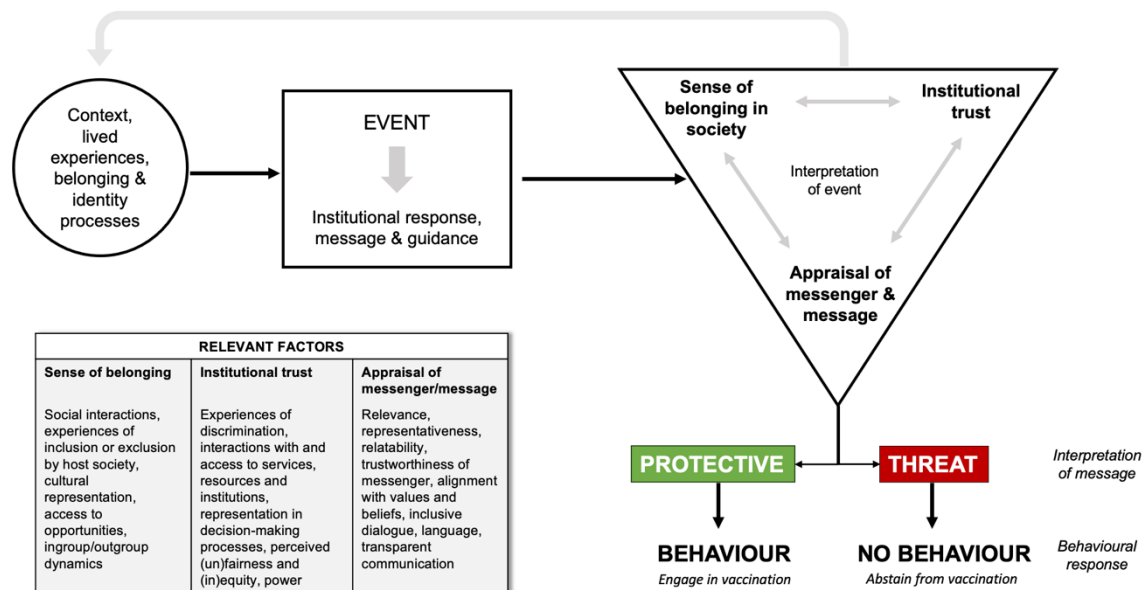

281  
 282 **Figure 1.** Model to understand engagement or non-engagement with COVID-19 health protective  
 283 behaviours/vaccination in Congolese migrants in the UK. The “EVENT” represents the COVID-19  
 284 pandemic. Institutional trust reflects confidence in authorities, sense of belonging represents  
 285 connectedness to wider society and in-groups, and perception of messenger/message relates to  
 286 trustworthiness and relevance of information based on their worldview.

287  
 288 **Theme 1: Belonging and identity in the wider context of lived experiences of migration**

289  
 290 This theme first explores the intersecting social categories, systems and power structures shaping our  
 291 participants’ sense of belonging (24). Next, it considers the impact of the COVID-19 pandemic on  
 292 participants and explores how the policy response challenged notions of belonging and identity and  
 293 elevated participants’ alienation and mistrust towards Government and wider social systems.  
 294  
 295 Participants’ narratives presented a layered picture of belonging. Community, respect for elders,  
 296 and being connected to their religious faith emerged as important aspects of their social identities.  
 297 The significance of faith was noted and reflected in their use of biblical references to articulate their  
 298 beliefs. Participants’ cultural identities were strengthened through attachments to Congolese culture  
 299 and ways of life, including social gatherings, gospel music, creative expression, and local community

300 ties. These attachments fostered feelings of safety and inclusion within their in-group, offering a  
301 refuge of shared experiences and values. However, participants also shared their perceptions of not  
302 being embraced by, or belonging to, British society. These perceptions were informed by experiences  
303 of exclusion and othering, rooted in language barriers, citizenship status (or labelling/othering based  
304 on legal status), discriminatory practices, and the challenges of navigating the system as a migrant.  
305 This was particularly evident when it came to navigating the healthcare system, where they  
306 highlighted examples of receiving sub-standard care and having their eligibility questioned. Some  
307 participants said they had sought alternative treatment or withdrew from seeking further care because  
308 of this, while others expressed a sense of injustice, particularly given their contributions through  
309 taxation. These shared experiences may have fostered a sense of comradery and internal belonging  
310 (with their in-group or 'insiders') while deepening their sense of alienation from wider society (their  
311 perceived out-group or 'outsiders').

312 *"In my case, because I work a lot with the community, yes, some people are*  
313 *asylum seekers and there's a discrimination when they turn up to a GP to register.*  
314 *They ask them for so many documents, your passport, proof of address and when*  
315 *they don't have that it's just putting them off."* P5

316 \*\*\*

317 *"If we go again [to] the GP in this country, when you try to phone them, maybe*  
318 *have to take you two hours, three hours, before to pick up the phone. And then*  
319 *when they pick up the phone in reception, okay, they give you now appointment.*  
320 *Appointment may be two weeks or three weeks before to see you. I don't know.*  
321 *[...] Is embarrassing. For now, the GP, I think, is a joker. [...] When they come to*  
322 *see you after that, they give you a paracetamol. What's going on? We work in this*  
323 *country. We pay the tax... Why the thing must go like that? Why?"* P11

324  
325 Participants described varying responses to their experiences of exclusion. Some responded through  
326 self-protective mechanisms such as withdrawal, while others adapted and formed new attachments  
327 and memberships which secured their inclusion, and potentially increased their sense of belonging in

328 society or connectedness to wider society (the out-group) (Figure 1). Furthermore, beliefs and  
329 perceptions regarding belonging and identity were dynamic and appeared to evolve over time and  
330 across generations. One participant shared that when they first arrived in the UK, they had been told,  
331 “this country is English country, to understand and to be free you need to learn [English]” (P26). It is  
332 unclear who their interaction was with, but their further comments suggested they now conformed to  
333 this mindset:

334 *“Not Congo, I'm not living in Congo at the moment, now I'm in here in England. I*  
335 *need to follow the instruction from here. I need to follow the news from here to get*  
336 *better life. So that better life we need to share with people who doesn't understand*  
337 *something like this. They don't like to understand because many African they not*  
338 *respect the law. Yes, many African they don't want to respect the law. I don't know*  
339 *why.” P26*

340  
341 Reflecting on the pandemic, participants highlighted the incompatibility of restrictions with their  
342 communal culture and explained that lockdowns and social distancing measures had impacted their  
343 ability to be together, which had led to sadness, loneliness, and uncertainty, as well as the perception  
344 of ‘being watched’. The loss of loved ones to COVID-19 further compounded their distress. Drawing  
345 on the framework of social identity theory (22, 51), the enforced separation during the pandemic may  
346 have disrupted participants’ collective and self-identities and sense of belonging at a more profound  
347 level by compounding their experiences of marginalisation.

348 *“Yes, it's a big problem because now we cannot meet each other and then most*  
349 *people, they lost their relatives. And then it divided people, that's what I can say*  
350 *because we Africans need to be together, but because of Covid we cannot be*  
351 *together. No party, no group, no church. We like to go to the church to pray, to*  
352 *meet with people but we don't do it anymore. [...] They were not allowed to come*  
353 *because the government is watching them.” P21*

354 \*\*\*

355           *“No, you know, Congolese people we are different, I am telling the truth. Some*  
356           *people care, and other don't. If you are telling them to respect social distancing,*  
357           *they will tell you that we are community people. We are different.” P18*

358

359   During this period of uncertainty, participants drew on familiar belief systems, such as their Catholic  
360   faith. Several participants collectively identified with the need for ‘proof’ when faced with uncertainty;  
361   the absence of which may have heightened their sense of vulnerability.

362           *P18: “Congolese people are like Thomas who wanted to put his finger in Jesus*  
363           *wound before he would believe that Jesus has been resurrected.*

364           *I: You mean Congolese people need proof?*

365           *P18: Yes, they need proof...”*

366

367   Some participants highlighted the impact of the pandemic on their spiritual journey and relationship  
368   with God, referring to the Ignatian concept of discernment of spirits – judging good from evil – guiding  
369   their worldview and decision-making process. Navigating the crisis of the pandemic without regular  
370   access to spiritual guidance may have intensified participants’ perceived need for spiritual  
371   discernment. This is reflected in how they conceptualised the pandemic and their (or others’)  
372   engagement with government messages and guidance. Some placed their faith above governmental  
373   matters, while others saw non-compliance with health guidance as a form of defiance against divine  
374   orders.

375           *I: In your view, how has the government managed the Covid-19 pandemic?*

376           *P20: I don't have an opinion about the government because I am more engage(d)*  
377           *in serving God than the government business.*

378

\*\*\*

379           *I: Why do you think those people they don't want to listen to the government or the*  
380           *advice?*

381 *P26: Is [because] they're bad spirited [...] It's like God give us intelligence and*  
382 *such, what does God give to the nurse, to the doctor, is like a good spirit to help*  
383 *us [...] So if you don't listen to the people who want to save your life, it's like you*  
384 *are abusing the order from the heaven. Sometimes, it's like when we are praying,*  
385 *we pray for those people.*

386

## 387 **Theme 2: Evaluating and interpreting health information**

388 This theme considers how participants interpreted and evaluated health information: (a) interpreting  
389 the message, and (b) evaluating the messenger: representativeness and trust.

390

### 391 **A) Interpreting the message**

392

393 Nearly all participants perceived vaccines in general as protective (“Vaccines are good to protect  
394 against diseases”) and routine (“We take vaccines from birth”) but expressed mistrust of COVID-19  
395 vaccines specifically. They largely attributed this mistrust to rumours, including misinformation, and  
396 muddled messaging about COVID-19 that were spread through social media, social networks (friends  
397 and family), and government messaging.

398 *“Yes, people know that vaccines protect, but based on the information they are*  
399 *reading on media on TV, it's putting people off.” P5*

400

401 Many participants experienced dilemmas while evaluating health information and deciding on a  
402 course of action, due to the presence of widespread rumours, misinformation, fear, and suspicion  
403 about the COVID-19 vaccine. They expressed uncertainty about whether to get vaccinated, driven by  
404 a perception that the vaccine may pose risks to black people. These concerns were further  
405 compounded by worries about fairness and the potential for discrimination. A crucial factor influencing  
406 their decision-making process appeared to be their personal biography as refugees, having come to  
407 the country for protection. This unique background added an additional layer of complexity to their risk  
408 assessment and decision-making. Many participants acknowledged the prevailing confusion and



409 misconceptions within African and Congolese communities regarding the safety and effectiveness of  
410 the vaccine.

411 *“It was not easy for me [to get the vaccine] because there was so many rumours*  
412 *and I was questioned myself if do I have to take it or not. We came in this country*  
413 *to seek protection. I just realised that white people are receiving their*  
414 *vaccinations, its means that not only they want to kill only black people. All of us*  
415 *are standing in the same queue to receive the same vaccine. It means that all of*  
416 *us are going to die? There has been lot confusion about negative rumours*  
417 *concerning covid-19 vaccine. African in general and especially Congolese people*  
418 *has wrong judgement about the vaccine. We are not doctors but we [are]*  
419 *searching about vaccines. It was not easy to take vaccines because of negative*  
420 *rumours and publicity saying that if you receive the vaccine you are not going to*  
421 *live for the next 3 months. Another person placed his phone on his arm to show*  
422 *how the phone was stuck after receiving his jab. How come a mobile phone can*  
423 *stick on somebody’s arm?” – P4*

424

425 Participants shared concerns and rumours (38, 52-54) reported by other migrant and ethnically  
426 minoritised groups about the origins and consequences of COVID-19 vaccines/vaccination, including  
427 that they were designed by people or systems (scientists, the NHS, the government, Bill Gates) to  
428 cause harm, kill, reduce, or spy on the global population, and black and African populations  
429 specifically; or that they had demonic or apocalyptic associations. They also expressed concerns  
430 about safety and side effects, which originated from the aforementioned conspiracy theories, public  
431 information (e.g. clotting risks associated with the AstraZeneca COVID-19 vaccine), knowledge of  
432 their own risk factors, and personal experience of side effects. Some participants believed that the  
433 evidence of adverse events and the frequent changes in government guidance and  
434 recommendations, such as the need for additional doses and boosters, indicated that the vaccine was  
435 not safe or ready when it was first rolled out. They contrasted this with the flu vaccine, which they  
436 considered to be safer:

437 *“People are not really reluctant to have flu vaccines because they are convinced*  
438 *that it has been experimented in people for many years and it’s safe for them to*  
439 *take it, but this one [COVID-19 vaccine], there are a lot of things that have been*  
440 *said.” – P5*

441  
442 Changes in guidance and perceived lack of transparency by the government were off-putting to many  
443 participants and appeared to erode trust in the messenger. The lack of clarity and certainty in  
444 messages resulted in confusion and led some participants to question if something more sinister was  
445 being hidden behind the vaccine. Some also considered the vaccine’s inability to prevent infection as  
446 a scientific failure. Participants questioned the clarity, relevance, and representativeness of messages  
447 and gave examples of ways the messages didn’t reflect their reality or circumstances; for example,  
448 two participants dependent on shift work said they had wished they had known more about the  
449 vaccine’s side effects before getting vaccinated, so they could better plan their schedules.

450 *“I was not sure about the research carried of the vaccine as researchers*  
451 *themselves had doublespeak [and] were not sure about their own work. I was*  
452 *scared and reluctant about the vaccines because I was confused with the*  
453 *information from research. The vaccine prevents you not to catch illness but it*  
454 *doesn’t means that you may not be infected. There was a lot of confusion, and*  
455 *this was the reason I was not ready to be vaccinated. I was not sure because*  
456 *scientists were not clear in their language.” -P6*

457  
458 Participants indicated that in the absence of clear information or proof about the consequences of  
459 vaccination, they needed to seek out answers independently, as part of their risk evaluation and  
460 decision-making process. This centred on whether a course of action (e.g. vaccination) could be  
461 deemed ‘protective’ or a ‘threat’. Events which heightened the perception of vaccination as a threat  
462 were more prevalent and included vaccine scares reported by the media and relatively rare instances  
463 of vaccine-derived poliomyelitis (notably, DRC is one of few countries with recurring vaccine-derived  
464 polio outbreaks), which participants recalled from polio vaccination campaigns during their childhood.  
465 For example:

466            *“Some children have become disabled after receiving polio vaccine. [...] [They are*  
467            *afraid] because the side effects of vaccine have caused to their children to*  
468            *become disabled, and they don’t want again to take the risk.” –P2*

469  
470 Many participants said they had developed hypertrophic or keloid scars from vaccination in childhood,  
471 which had made them associate vaccination with pain and fear. They also alluded to historical racist  
472 and unethical medical practices against African people and expressed concerns that they were still  
473 being used as ‘guinea pigs’ into the present day, referencing racist remarks by French doctors about  
474 testing coronavirus vaccines in Africa (55).

475  
476 The principles of heuristics (mental shortcuts to making quick decisions) can help to explain decision-  
477 making processes under uncertainty (56). Facing an overwhelming amount of contradictory and  
478 changing information, our participants may have experienced indecision and defaulted to believing in  
479 or following information that confirmed their worldview (confirmation bias), or that which was most  
480 readily available to them (such as misinformation and rumours). This may help to explain why  
481 individuals experiencing alienation and social exclusion may have been less likely to engage with  
482 COVID-19 vaccination (Figure 1).

483

#### 484        **B) Evaluating the messenger: representativeness and trust**

485

486    *The source of the messenger* delivering the message was critical in determining whether it was  
487 trusted and followed by participants. Messages delivered by ‘outsiders’, including the Government,  
488 were generally perceived as misleading, unreliable, and coercive. Messages delivered by ‘insiders’,  
489 such as members of participants’ own communities, were considered more representative, relatable,  
490 relevant, and trustworthy. Participants were more trusting of local community members who were  
491 known to them and represented their communities rather than somebody who might not know their  
492 community’s histories.

493

494 Participants generally expressed mistrust towards the Government and felt they were being  
495 “pressured”, “forced”, and “pushed” by the Government to receive COVID-19 vaccines. Vaccine  
496 reminders were perceived on a negative spectrum, ranging from an annoyance to an indication of  
497 something more sinister that should be resisted (“It means that there is unknown information behind  
498 this.” P4). One participant remarked, “I would do it voluntarily, but not by force.” (P16), adding that the  
499 constant reminders had deterred them and heightened their suspicions of what might be hidden  
500 behind the vaccine. Comparisons were again drawn with the flu vaccine, which was felt to be  
501 uncontentious:

502 *“People have never been forced to receive flu vaccine. If you don’t want to take*  
503 *your flu jab, the GP will not force you to take the jab, but this (referring to the covid*  
504 *vaccine) has become an obligation.” P4*

505 Although we did not explore vaccine mandates with all participants, those we spoke to felt they  
506 imposed excessive control over people’s lives. One participant (P24) said they would “definitely” leave  
507 their job if their employer introduced mandatory COVID-19 vaccination. It was also apparent that  
508 some participants felt their views and concerns were being ignored and overlooked, and mandates  
509 were a way for the Government to avoid addressing or considering wider and more peripheral  
510 viewpoints and being used as a form of oppression and control.

511 *“The people in the power, the government, must listen to the voice of all the*  
512 *people antivax. After three months, you must take the vaccine [booster]. It’s no*  
513 *good like that. And then COVID pass is no good. Before you get to the restaurant,*  
514 *you go to the events like that, you must to show something like that. It’s not work*  
515 *like that. The people now limits. Life, now, is finished.” P11*

516  
517 One participant explained why mandates and reminders were so triggering and proposed ways of  
518 communicating that might be more effective and less likely to elicit an emotional response or feeling  
519 of being coerced among members of their community. Community members wanted reassurance,  
520 and for their concerns and reservations to be addressed, rather than perceived as unjustified.

521 *“Basically, to force someone is like he thinks you give him poison. When you force*  
522 *someone... like me, I like vegetables, but she doesn't like, he doesn't like*  
523 *vegetables. Why can you force him? You need to help him to understand that*  
524 *vegetable is not poison. [...] So, when you force someone, it will get [him] thinking*  
525 *more things [like]: ‘they kill me’, ‘they give me poison’, ‘they want to...’ He will think*  
526 *[that] because no he doesn't like [it]. But if you help, you advise, you make him*  
527 *understand, like [with a] baby: ‘don't do that’, ‘don't touch’, ‘this is a fire’, ‘don't eat*  
528 *this, it's a poison’, until you will see him calm down [and] say ‘Really, this thing is*  
529 *good, let me go and get it.’” – P26*

530

531 For many participants, the Government represented the orchestrator of their reduced freedoms and  
532 the supplier of said ‘poison’. As alluded to above though, some participants described having positive  
533 interpersonal relationships with their local social network, including GPs, managers, and neighbours,  
534 which were influential on changing their views and behaviour. For example, a few participants who  
535 had been initially hesitant about COVID-19 vaccination changed their mind after having a  
536 conversation with a trusted source or seeing a friend get vaccinated:

537 *“Yes, I spoke with my GP when the news came out that people were having blood*  
538 *clots and I was so scared, I cancelled my appointment two or three times. [...] My*  
539 *GP advised me and said don't worry. [...] That's when I was convinced to go and*  
540 *get the second one because I seek medical advice.” P5*

541

\*\*\*

542 *“After I have seen too, some people around me, they got the vaccination and they*  
543 *advise me. I say, okay, I need to go get [it]. [...] My wife too, got the vaccination. I*  
544 *send her to go get the vaccination after I got my one.” P29*

545

546 Certain members of the community also took on the role of encouraging others to get vaccinated. This  
547 included individuals who had initially been ambivalent or cautious but had since had a positive  
548 vaccination experience. Unlike the official messaging deployed, these unofficial community role

549 models used approaches that were perceived as being more representative, relevant, and resonated  
550 with the community and their values. One participant described how they encouraged their community  
551 “not by force”, and appealed to values of community, care, protection, and safety:

552 *“We keep advising them not by force, but patiently to tell them respectfully, to*  
553 *explain to them it's like this, it's important, it's for saving life, saving our kids,*  
554 *saving everything in our community. Something like this.” P26*

555  
556 Others directly addressed the specific concerns and causes of mistrust that people raised, and which  
557 they could relate to, such as hidden Government motives or malintent stemming from histories of  
558 repression, and sought to debunk them:

559 *“Some for them, it's a scare. But I advised them, I said to them, it's nothing.*  
560 *Because look at it. People is thinking wrong. They say maybe it's a poison. I have*  
561 *advised them. I said, no. Look at me. In England, it's not like Africa. Because the*  
562 *government for England is work for their people. Is work for their community. It*  
563 *can't kill anyone, everyone in the same [boat] about the vaccine.” P29*

564

## 565 **Linkage to model**

566 Figure 1 provides an explanation for how participants' context, lived experiences and sense of  
567 belonging shaped their interpretation of information and their behavioural response to COVID-19  
568 vaccination. The triangle depicts the interplay between institutional trust, belonging, and the appraisal  
569 of messages and the messenger. Our data suggest these factors vary between individuals and can  
570 change over time (shown by the grey arrow). When these factors align positively, individuals adopt  
571 health-protective behaviours (perceiving them to be protective), like vaccination. Conversely, if  
572 individuals feel alienated, mistrust institutions, and messages and messengers do not reflect their  
573 values or needs, they may reject the information (perceiving it to be a threat) and not adopt the  
574 desired health-protective behaviour.

575

## 576 **Discussion**

577 This study explored how the lived experiences of Congolese migrants in the UK shaped their sense of  
578 belonging, trust in institutions, message perception, and ultimately their vaccination decision-making  
579 during the COVID-19 pandemic. Participants described how experiences of discrimination, exclusion  
580 from healthcare, and pandemic-related restrictions heightened their feelings of alienation from British  
581 society. Awareness of medical exploitation of Black Africans and vaccine-related fears and scares  
582 contributed to concerns about the safety and effectiveness of the COVID-19 vaccine. Additionally,  
583 perceptions of government corruption in the DRC, and a lack of clear, relatable or representative  
584 messages from UK officials, reinforced mistrust of authorities. The conceptual model depicts the  
585 interplay of these factors in shaping participants' vaccination decisions, leading to (non-)engagement  
586 with COVID-19 vaccination, while also providing a framework for understanding broader health-  
587 related decision-making. These findings emphasise the profound impact of personal experiences and  
588 worldviews on vaccination decisions, particularly among intersectionally marginalised populations,  
589 and underscore the importance of addressing structural inequalities to strengthen vaccination uptake.  
590

591 Our findings build on recent research, such as Vandrevalla et al. (2022), which highlighted how the  
592 crisis of the pandemic, combined with historical and contemporary mistrust, provided a context for  
593 alternative conspiracy narratives to thrive in UK black communities (18). Our study findings lend  
594 support to this interpretation, while further underscoring the pivotal role of context and lived  
595 experience in shaping migrants' belonging and identity processes and levels of institutional trust, and  
596 subsequently, how health messages are received and acted upon. Bury's notion of biographical  
597 disruption (57) may also help us to understand the impact of the pandemic on our participants' sense  
598 of belonging and their decision-making. Biographical disruption aims to describe the influence of a  
599 significant, sudden event on the course of a person's life, which Bury argued occurs in three ways: 1)  
600 disruption of 'taken for granted' assumptions and behaviours, creating heightened awareness of our  
601 bodily state, 2) disruption of explanatory frameworks, leading us to re-think our biography and  
602 question our sense of self and future trajectory, and 3) disruption of the way we deploy our resources,  
603 physically (time and effort) and socially (activities we pursue; financially) (57, 58). We found that the  
604 pandemic heightened participants' awareness of their actions, prioritising behaviours vital for their  
605 safety or security. It prompted them to ask questions about their biography, such as why this was  
606 happening to them, and what had caused it; and it changed the way they acted and behaved.

607 Applying this lens may deepen our understanding of our participants' responses to the pandemic and  
608 their COVID-19 vaccination choices and support the design of more personalised vaccination and  
609 health interventions. Moreover, these insights may help define responses to help individuals cope with  
610 enduring life changes beyond the pandemic.

611

612 Several qualitative studies exploring beliefs about COVID-19 vaccination and other vaccinations have  
613 identified concerns about safety and effectiveness and fear of side effects (38, 52-54, 59). These  
614 were also reported in our study; however, we also noted novel factors specific to our population which  
615 might help to explain how these concerns originated. Many participants in our study associated  
616 vaccines with pain partly because of the keloid scarring they had developed after receiving childhood  
617 immunisations, particularly BCG. Extensive literature suggest that keloids form more readily in dark  
618 compared to light skin, cause pain and distress, and can form at vaccination sites (60). This may help  
619 explain why fear of pain and side effects were frequently mentioned as a barrier to COVID-19  
620 vaccination in this population, and perhaps also why participants expressed wanting to know in  
621 advance more about what to expect from getting vaccinated. Many of our participants experienced  
622 mass immunisation campaigns as children in the DRC, where the emphasis may have been on 'jabs  
623 in arms' as opposed to informing recipients or providing aftercare. Our findings highlight how the  
624 medical experiences of black and racialised people are overlooked in the medical literature and in  
625 informing medical practice. Greater consideration must be given to how specific medical practices can  
626 shape collective beliefs about vaccines and the medical institution over generations, especially among  
627 groups who already share beliefs that they have been historically exploited by medical authorities,  
628 with clear communication of risks and implementation of alternative measures where possible. Our  
629 participants also had relatively specific knowledge and views about vaccination, drawn from personal  
630 and group experiences. For example, participants highlighted cases of vaccine-derived polio,  
631 including paralysis, and international examples of vaccination scares. Being a migrant population with  
632 close links to a country with history of mass vaccination campaigns and circulating vaccine-derived  
633 poliovirus strains, these references should perhaps not be unexpected, and may help contextualise  
634 participants' fears. These examples highlight the importance of understanding population  
635 demographics and migration patterns and considering the influence of past experiences, histories,  
636 and context on values and behaviour when designing and implementing public health interventions,



637 particularly for migrant populations. They also underscore the role of governments in promoting public  
638 trust and confidence, and of demonstrating their competence through proactive, transparent, and  
639 comprehensive communication with populations (61).

640

641 Participants' mistrust of Government and authority appear to stem from historical and more recent  
642 experiences of injustice and oppression. Depending on the timing and context of their migration  
643 (noting that around 60% of participants were asylum seekers and refugees), experiences of violence  
644 and war in Congo and marginalisation and discrimination as newcomers in UK society will have likely  
645 shaped their worldview. Their perception of vaccine reminders and recommendations as coercive is  
646 an important finding and suggests vaccine mandates or other enforcement-based public health  
647 measures (which are a recommended strategy for achieving high vaccine uptake (62)) would not be  
648 suitable to implement in this population (nor populations with similar experiences, beliefs, and value  
649 systems), as they would likely further undermine trust. It also highlights the importance of considering  
650 the cultural relevance of interventions during their design (prior to roll-out) and involving members of  
651 represented groups in tailoring their design to ensure they are appropriate and acceptable for the  
652 intended audience(s). These findings align with other recent work, for example, a US study of the  
653 effect of COVID-19 vaccine mandates on vaccine attitudes and behaviours concluded that mandates  
654 are unlikely to change vaccination behaviour overall and may deter considerable percentages of  
655 people from engaging in activities where vaccines are mandated (63). A second US study reported  
656 that more Black respondents found hypothetical vaccine mandates for adults unacceptable compared  
657 to non-Black respondents (64). Our findings also corroborate and build on the hypothesis of  
658 Tankwanchi and colleagues (2021) who suggested, in their rapid review of literature reporting on  
659 vaccine hesitancy in migrant communities, that experiences of xenophobia, marginalisation, and  
660 discrimination in host countries diminish migrants' trust in the health system and may exacerbate  
661 vaccine hesitancy along a pathway of social exclusion (65). Recent literature exploring reasons for  
662 vaccine hesitancy among diverse groups has proposed that aligning pro-vaccination messages with  
663 the moral values and intuitions that people endorse may be more effective than vaccination  
664 mandates. Of note, a UK study (66) found that individuals who more strongly endorsed the moral  
665 foundation of liberty, which prizes freedom, choice, and individual rights (67), tended to be more  
666 vaccine hesitant. Members of the Collaboration on Social Science and Immunisation (Australia) also

667 recently proposed that less coercive, trust-promoting measures should be prioritised over mandates,  
668 along with efforts to understand and address context-specific factors (68). Future research could  
669 involve exploring how migrants' unique contexts give rise to the endorsement of specific moral values.  
670 These insights could shed further light on the processes underlying vaccination behaviour, aiding the  
671 development of vaccination messages that integrate both context and value systems. This could be  
672 relevant to designing strategies to improve uptake of catch-up vaccinations in adolescent and adult  
673 migrants, which is an increasingly important policy area requiring further planning (69), as well as  
674 other health promotion strategies, and in future public health crises. Overall, the findings of this study  
675 provide new insights into the importance of inequalities in understanding responses to public health  
676 crises, reinforcing the argument for increased research on this topic and for integrating the reduction  
677 of systematic inequalities as a fundamental component within disaster planning (70).

678

679 A key recommendation from this study is for policymakers and practitioners to work closely with  
680 communities to understand their needs in context, recognising that public health interventions go  
681 beyond health and interact with and influence notions of belonging in communities. Policymakers  
682 need to be aware of this and of the potential risks if public health interventions aren't carefully  
683 designed. In parallel, governments should shoulder the responsibility for building trust and fostering  
684 social cohesion as proactive measures. This should include implementing measures which share  
685 power, promote social justice, are anti-racist and reparatory, build and maintain trust, and are situated  
686 within frameworks of wider social processes.

687

### 688 **Strengths and limitations**

689 Aligning with other initiatives aiming to address health inequalities (71-75), a strength of this study  
690 was its participatory, power-sharing approach, which provided members of Congolese community-  
691 based organisation with training and funding to lead a study exploring a public health issue of  
692 importance to their community. Having trusted members of the target population lead and conduct the  
693 study may have also contributed to the openness of participants and the rich data generated. Our  
694 theoretical and conceptual approach allowed us to explore our objectives through the language of our  
695 participants and locate their lived experiences within wider political, historical, and sociocultural  
696 discourses. Subsequently, our model may help improve understanding of migrants' health decision-

697 making processes and lead to the development of tailored public health interventions which better  
698 consider their personal histories, cultural identities and lived experiences.

699 A limitation is the study's focus on a specific Congolese community in London, meaning that the  
700 specific historical and contemporary influences that informed their beliefs and behaviours may not be  
701 generalisable to other marginalised communities in different contexts. Our study also did not  
702 disaggregate by ethnicity; therefore, our participants may represent diverse Congolese ethnic groups  
703 whose unique histories are not adequately reflected here. Nonetheless, our overarching finding that  
704 health perceptions and behaviours are rooted in long-standing societal issues will be relevant for  
705 many intersectionally marginalised migrant populations, and has immediate implications for  
706 practitioners, policymakers and academics working to address health inequalities and design tailored  
707 public health interventions. Being an exploratory study, this research did not set out to explore notions  
708 of belonging and identity; rather, these themes were generated through immersion in the data and the  
709 inductively developed analysis. Future research may now build on and test our findings and  
710 theoretical approach more purposively. We discuss other strengths and limitations of our work in our  
711 accompanying intervention co-design paper (76).

## 712 **Conclusions**

713 This study highlights the need to work closely with migrant communities to co-design culturally  
714 appropriate interventions that build trust and promote inclusion. Fostering this sense of ownership and  
715 trust may secure improved health outcomes among migrant populations. Governments must at the  
716 same time recognise the need to address structural inequalities and upstream factors to strengthen  
717 public health and immunisation programmes and reduce population health disparities.

718

## 719 **Author contributions**

720

721 **Alison F Crawshaw:** conceptualisation, methodology, formal analysis, investigation, resources, data  
722 curation, writing – original draft, visualisation, supervision, project administration, partial funding  
723 acquisition; **Tushna Vandrevala; Felicity Knights:** formal analysis, writing – review & editing,  
724 visualisation; **Lusau Mimi Kitoko, Sarah Nkembi, Laura Muzinga Lutumba, Caroline Hickey:** data

725 collection, analysis, project administration, writing – review & editing; **Anna Deal:** writing – review &  
726 editing; **Alice S Forster:** writing – review & editing, supervision; **Sally Hargreaves:** writing – review &  
727 editing, supervision, funding acquisition.

728

## 729 **Acknowledgments**

730 We are grateful to the participants who shared their life experiences with us and actively participated  
731 in the study. We are also grateful to our coalition and wider supporters for their dedication and  
732 commitment to sharing knowledge, working, and learning together for the betterment of community  
733 health. We thank the local community organisations, including Hackney CVS, Hackney Refugee and  
734 Migrant Forum, Halkevi Turkish and Kurdish Community Centre, Community African Network, Clapton  
735 Park United Reformed Church, and artist Jonny Glover, that championed our project and generously  
736 provided spaces and resources to support our work. Thank you also to Alena Kamenshchikova for her  
737 thoughts and reflections on formative stages of our analysis, and the members of our St George’s  
738 PPIE Advisory Board, particularly Yusuf Ciftci.

739

## 740 **Funding information**

741 This work was supported by the National Institute for Health Research (NIHR Advanced Fellowship  
742 300072) and seed funding from St George’s Public Engagement Network. SH and AFC are  
743 additionally funded by the Academy of Medical Sciences (SBF005\1111) and the World Health  
744 Organization. SH acknowledges funding from the Novo Nordisk Foundation/La Caixa Foundation  
745 (Mobility– Global Medicine and Health Research grant). AD is funded by the MRC (MR/N013638/1).  
746 The funders did not have any direct role in the writing or decision to submit this manuscript for  
747 publication. The views expressed are those of the author(s) and not necessarily those of the NHS, the  
748 NIHR, or the Department of Health and Social Care. The funder of the study had no role in study  
749 design, data collection, data analysis, data interpretation, or writing of the report.

750

## 751 **Conflicts of interest**

752 The authors have no conflicts of interest to declare.

753

## 754 References

- 755 1. Hayward SE, Deal A, Cheng C, Crawshaw A, Orcutt M, Vandrevalla TF, et al. Clinical  
756 outcomes and risk factors for COVID-19 among migrant populations in high-income countries: A  
757 systematic review. *J Migr Health*. 2021;3:100041.
- 758 2. Public Health England. Beyond the data: understanding the impact of covid-19 on BAME  
759 groups. . 2020.
- 760 3. Landry V, Semsar-Kazerooni K, Tjong J, Alj A, Darnley A, Lipp R, et al. The systemized  
761 exploitation of temporary migrant agricultural workers in Canada: Exacerbation of health  
762 vulnerabilities during the COVID-19 pandemic and recommendations for the future. *Journal of*  
763 *Migration and Health*. 2021;3:100035.
- 764 4. Castellon-Lopez YM, Carson SL, Mansfield L, Garrison NA, Barron J, Morris DA, et al.  
765 &ldquo;The System Doesn&rsquo;t Let Us in&rdquo;&mdash;A Call for Inclusive COVID-19 Vaccine  
766 Outreach Rooted in Los Angeles Latinos&rsquo; Experience of Pandemic Hardships and Inequities.  
767 *International Journal of Environmental Research and Public Health*. 2022;19(10):5785.
- 768 5. Quadri NS, Knowlton G, Vazquez Benitez G, Ehresmann KR, LaFrance AB, DeFor TA, et al.  
769 Evaluation of Preferred Language and Timing of COVID-19 Vaccine Uptake and Disease Outcomes.  
770 *JAMA Network Open*. 2023;6(4):e237877-e.
- 771 6. Spiritus-Beerden E, Verelst A, Devlieger I, Langer Primdahl N, Botelho Guedes F, Chiarenza  
772 A, et al. Mental Health of Refugees and Migrants during the COVID-19 Pandemic: The Role of  
773 Experienced Discrimination and Daily Stressors. *Int J Environ Res Public Health*. 2021;18(12).
- 774 7. Mazzalai E, Giannini D, Tosti ME, D'Angelo F, Declich S, Jaljaa A, et al. Risk of Covid-19  
775 Severe Outcomes and Mortality in Migrants and Ethnic Minorities Compared to the General  
776 Population in the European WHO Region: a Systematic Review. *Journal of International Migration*  
777 *and Integration*. 2023.
- 778 8. Greenaway C, Hargreaves S, Barkati S, Coyle CM, Gobbi F, Veizis A, et al. COVID-19:  
779 Exposing and addressing health disparities among ethnic minorities and migrants. *Journal of Travel*  
780 *Medicine*. 2020;27(7).
- 781 9. Abba-Aji M, Stuckler D, Galea S, McKee M. Ethnic/racial minorities' and migrants' access to  
782 COVID-19 vaccines: A systematic review of barriers and facilitators. *J Migr Health*. 2022;5:100086.
- 783 10. Balasuriya L, Santilli A, Morone J, Ainooson J, Roy B, Njoku A, et al. COVID-19 Vaccine  
784 Acceptance and Access Among Black and Latinx Communities. *JAMA Network Open*.  
785 2021;4(10):e2128575-e.
- 786 11. Burns R, Campos-Matos I, Harron K, Aldridge RW. COVID-19 vaccination uptake for half a  
787 million non-EU migrants and refugees in England: a linked retrospective population-based cohort  
788 study. *The Lancet*. 2022;400:S5.
- 789 12. Dolby T, Finning K, Baker A, Fowler-Dowd L, Khunti K, Razieh C, et al. Monitoring  
790 sociodemographic inequality in COVID-19 vaccination uptake in England: a national linked data study.  
791 *J Epidemiol Community Health*. 2022;76(7):646-52.
- 792 13. Gaughan CH, Razieh C, Khunti K, Banerjee A, Chudasama YV, Davies MJ, et al. COVID-19  
793 vaccination uptake amongst ethnic minority communities in England: a linked study exploring the  
794 drivers of differential vaccination rates. *Journal of Public Health*. 2022.
- 795 14. Nguyen LH, Joshi AD, Drew DA, Merino J, Ma W, Lo C-H, et al. Self-reported COVID-19  
796 vaccine hesitancy and uptake among participants from different racial and ethnic groups in the United  
797 States and United Kingdom. *Nature Communications*. 2022;13(1):636.
- 798 15. Paudel YR, Du C, MacDonald SE. COVID-19 vaccine coverage among immigrants and  
799 refugees in Alberta: A population-based cross-sectional study. *J Glob Health*. 2022;12:05053.
- 800 16. Sapienza A, Falcone R. The Role of Trust in COVID-19 Vaccine Acceptance: Considerations  
801 from a Systematic Review. *Int J Environ Res Public Health*. 2022;20(1).
- 802 17. Adhikari B, Yeong Cheah P, von Seidlein L. Trust is the common denominator for COVID-19  
803 vaccine acceptance: A literature review. *Vaccine X*. 2022;12:100213.
- 804 18. Vandrevalla T, Hendy J, Hanson K, Alidu L, Ala A. Unpacking COVID-19 and Conspiracy  
805 Theories in the UK Black Community. *medRxiv*. 2022:2022.02.12.22270438.
- 806 19. Durieux-Paillard S. Differences in language, religious beliefs and culture: the need for  
807 culturally responsive health services. *Migration and health in the European Union*. 2011:203-12.
- 808 20. Berardi C, Lee ES, Wechtler H, Paolucci F. A vicious cycle of health (in)equity: Migrant  
809 inclusion in light of COVID-19. *Health Policy Technol*. 2022;11(2):100606.

- 810 21. United Nations Department of Economic and Social Affairs (UNDESA). Trust in public  
811 institutions: Trends and implications for economic security 2021 [Available from:  
812 <https://www.un.org/development/desa/dspd/2021/07/trust-public-institutions/>.  
813 22. Islam G. Social Identity Theory. In: Teo T, editor. Encyclopedia of Critical Psychology. New  
814 York, NY: Springer New York; 2014. p. 1781-3.  
815 23. Tajfel, H., & Turner, J. C. (1979). An integrative theory of intergroup conflict. In W. G. Austin,  
816 & S. Worchel (Eds.), The social psychology of intergroup relations (pp. 33-37). Monterey, CA:  
817 Brooks/Cole.  
818 24. Jones P & Krzyzanowski M. Chapter 2: Identity, belonging and migration: Beyond  
819 constructing 'others', in Identity, Belonging and Migration by Delanty, Wodak & Jones. . Delanty G  
820 WR, Jones P. , editor2008.  
821 25. Yuval-Davis N. The politics of belonging. The Politics of Belonging. 2011:1-264.  
822 26. Udah H. Searching for a Place to Belong in a Time of Othering. Social Sciences.  
823 2019;8(11):297.  
824 27. Udah H. 'Not by default accepted': The African experience of othering and being othered in  
825 Australia. Journal of Asian and African Studies. 2018;53(3):384-400.  
826 28. Udah H, Singh P. Identity, Othering and belonging: toward an understanding of difference and  
827 the experiences of African immigrants to Australia. Social Identities. 2019;25(6):843-59.  
828 29. Vandrevalla T, Alidu L, Hendy J, Shafi S, Ala A. 'It's possibly made us feel a little more  
829 alienated': How people from ethnic minority communities conceptualise COVID-19 and its influence  
830 on engagement with testing. Journal of Health Services Research & Policy. 2022;27(2):141-50.  
831 30. Chandler L. What is intersectionality, and what does it have to do with me? YW Boston. YW  
832 Boston.2017 [Available from: [https://www.ywboston.org/2017/03/what-is-intersectionality-and-what-](https://www.ywboston.org/2017/03/what-is-intersectionality-and-what-does-it-have-to-do-with-me/)  
833 [does-it-have-to-do-with-me/](https://www.ywboston.org/2017/03/what-is-intersectionality-and-what-does-it-have-to-do-with-me/).  
834 31. Kimberlé W. Crenshaw, Demarginalizing the Intersection of Race and Sex: A Black Feminist  
835 Critique of Antidiscrimination Doctrine, Feminist Theory and Antiracist Politics, 1989 U. Chi. Legal F.  
836 139 (1989).  
837 Available at: [https://scholarship.law.columbia.edu/faculty\\_scholarship/3007](https://scholarship.law.columbia.edu/faculty_scholarship/3007)  
838 32. Akbulut N, Razum O. Why Othering should be considered in research on health inequalities:  
839 Theoretical perspectives and research needs. SSM Popul Health. 2022;20:101286.  
840 33. Teng Y, Hanibuchi T, Nakaya T. Does the Integration of Migrants in the Host Society Raise  
841 COVID-19 Vaccine Acceptance? Evidence From a Nationwide Survey in Japan. Journal of Immigrant  
842 and Minority Health. 2023;25(2):255-65.  
843 34. Lévy-Leblond J-M. About misunderstandings about misunderstandings. Public Understanding  
844 of Science. 1992;1(1):17-21.  
845 35. Hodson J, Reid D, Veletsianos G, Houlden S, Thompson C. Heuristic responses to pandemic  
846 uncertainty: Practicable communication strategies of "reasoned transparency" to aid public reception  
847 of changing science. Public Underst Sci. 2023;32(4):428-41.  
848 36. Nzongola-Ntalaja G. The Congo from Leopold to Kabila : a people's history. London, New  
849 York: Zed Books : Distributed in the USA exclusively by Palgrave; 2002. Available from:  
850 <https://archive.org/details/congofromleopold00geor>.  
851 37. (IOM) IOFm. D.R. Congo Mapping Exercise, London, November 2006. . 2006.  
852 38. Crawshaw AF, Deal A, Rustage K, Forster AS, Campos-Matos I, Vandrevalla T, et al. What  
853 must be done to tackle vaccine hesitancy and barriers to COVID-19 vaccination in migrants? Journal  
854 of travel medicine. 2021;28(4):taab048.  
855 39. Crawshaw AF, Farah Y, Deal A, Rustage K, Hayward SE, Carter J, et al. Defining the  
856 determinants of vaccine uptake and undervaccination in migrant populations in Europe to improve  
857 routine and COVID-19 vaccine uptake: a systematic review. The Lancet Infectious Diseases.  
858 2022;22(9):e254-e66.  
859 40. Deal A, Hayward SE, Crawshaw AF, Goldsmith LP, Hui C, Dalal W, et al. Immunisation status  
860 of UK-bound refugees between January, 2018, and October, 2019: a retrospective, population-based  
861 cross-sectional study. The Lancet Public Health. 2022;7(7):e606-e15.  
862 41. Crawshaw AF, Hickey C, Lutumba LM, Kitoko LM, Nkempi S, Knights F, et al. Codesigning  
863 an intervention to strengthen COVID-19 vaccine uptake in Congolese migrants in the UK (LISOLO  
864 MALAMU): a participatory qualitative study protocol. BMJ Open. 2023;13(1):e063462.  
865 42. Crawshaw AF, Kitoko LM, Nkempi S, Lutumba LM, Hickey C, Deal A, et al. Co-designing a  
866 theory-informed, multi-component intervention to increase vaccine uptake with Congolese migrants: a  
867 qualitative, community-based participatory research study. medRxiv. 2023:2023.05.30.23290568.



- 868 43. O'Brien BC, Harris IB, Beckman TJ, Reed DA, Cook DA. Standards for Reporting Qualitative  
869 Research: A Synthesis of Recommendations. *Academic Medicine*. 2014;89(9):1245-51.  
870 44. Office for National Statistics; National Records of Scotland; Northern Ireland Statistics and  
871 Research Agency (2017): 2011 Census aggregate data. UK Data Service (Edition: February 2017).  
872 DOI: <http://dx.doi.org/10.5257/census/aggregate-2011-2>  
873 45. Hackney Council. Hackney Council Population Information: Deprivation data: Indices of  
874 Multiple Deprivation 2015 Briefing. 2015 [Available from: <https://hackney.gov.uk/population>.  
875 46. Office for National Statistics. Population of the UK by country of birth and nationality:  
876 individual country data. July 2020 to June 2021 edition. . 2021.  
877 47. Terry G, Hayfield N. Reflexive thematic analysis. *Handbook of qualitative research in*  
878 *education*: Edward Elgar Publishing; 2020. p. 430-41.  
879 48. Braun V, Clarke V. Can I use TA? Should I use TA? Should I not use TA? Comparing  
880 reflexive thematic analysis and other pattern-based qualitative analytic approaches. *Counselling and*  
881 *Psychotherapy Research*. 2021;21(1):37-47.  
882 49. Guba EG, Lincoln YS. *Fourth generation evaluation*: Sage; 1989.  
883 50. Hayes RL, Oppenheim R. *Constructivism: Reality is what you make it*. 1997.  
884 51. Tajfel, H., & Turner, J. C. (1979). An integrative theory of intergroup conflict. In W. G. Austin,  
885 & S. Worchel (Eds.), *The social psychology of intergroup relations* (pp. 33-37). Monterey, CA:  
886 Brooks/Cole.  
887  
888  
889 52. Deal A, Hayward SE, Huda M, Knights F, Crawshaw AF, Carter J, et al. Strategies and action  
890 points to ensure equitable uptake of COVID-19 vaccinations: A national qualitative interview study to  
891 explore the views of undocumented migrants, asylum seekers, and refugees. *J Migr Health*.  
892 2021;4:100050.  
893 53. Magee L, Knights F, McKechnie DGJ, Al-bedaery R, Razai MS. Facilitators and barriers to  
894 COVID-19 vaccination uptake among ethnic minorities: A qualitative study in primary care. *PLOS*  
895 *ONE*. 2022;17(7):e0270504.  
896 54. Razai MS, Osama T, McKechnie DGJ, Majeed A. Covid-19 vaccine hesitancy among ethnic  
897 minority groups. *BMJ*. 2021;372:n513.  
898 55. euronews. What French doctors and the WHO really said about Africa and vaccine testing.  
899 2020 [Available from: [https://www.euronews.com/2020/04/07/what-french-doctors-and-the-who-really-](https://www.euronews.com/2020/04/07/what-french-doctors-and-the-who-really-said-about-africa-and-vaccine-testing)  
900 [said-about-africa-and-vaccine-testing](https://www.euronews.com/2020/04/07/what-french-doctors-and-the-who-really-said-about-africa-and-vaccine-testing).  
901 56. Tversky A, Kahneman D. Judgment under Uncertainty: Heuristics and Biases. *Science*.  
902 1974;185(4157):1124-31.  
903 57. Bury M. Chronic illness as biographical disruption. *Sociol Health Illn*. 1982;4(2):167-82.  
904 58. Malcolm D, Pullen E. 'Everything I enjoy doing I just couldn't do': Biographical disruption for  
905 sport-related injury. *Health*. 2020;24(4):366-83.  
906 59. Deal A, Crawshaw AF, Carter J, Knights F, Iwami M, Darwish M, et al. Defining drivers of  
907 under-immunisation and vaccine hesitancy in refugee and migrant populations to support strategies to  
908 strengthen uptake of COVID-19 vaccines: a rapid review. *Journal of Travel Medicine*. 2023.  
909 60. Chike-Obi CJ, Cole PD, Brissett AE. Keloids: pathogenesis, clinical features, and  
910 management. *Semin Plast Surg*. 2009;23(3):178-84.  
911 61. OECD. Enhancing public trust in COVID-19 vaccination: the role of governments.; 2021.  
912 62. World Health Organization. Behavioural and social drivers of vaccination: tools and practical  
913 guidance for achieving high  
914 uptake. . Geneva: World Health Organization,; 2022.  
915 63. Kreps SE, Kriner DL. How do COVID-19 vaccine mandates affect attitudes toward the  
916 vaccine and participation in mandate-affected activities? Evidence from the United States. *Vaccine*.  
917 2022;40(51):7460-5.  
918 64. Largent EA, Persad G, Sangenito S, Glickman A, Boyle C, Emanuel EJ. US Public Attitudes  
919 Toward COVID-19 Vaccine Mandates. *JAMA Network Open*. 2020;3(12):e2033324-e.  
920 65. Tankwanchi AS, Bowman B, Garrison M, Larson H, Wiysonge CS. Vaccine hesitancy in  
921 migrant communities: a rapid review of latest evidence. *Curr Opin Immunol*. 2021;71:62-8.  
922 66. Schmidtke KA, Kudrna L, Noufaily A, Stallard N, Skrybant M, Russell S, et al. Evaluating the  
923 relationship between moral values and vaccine hesitancy in Great Britain during the COVID-19  
924 pandemic: A cross-sectional survey. *Soc Sci Med*. 2022;308:115218.  
925 67. Mills B, Wilner A. The science behind "values": Applying moral foundations theory to strategic  
926 foresight. *FUTURES & FORESIGHT SCIENCE*. 2023;5(1):e145.

- 927 68. Leask J, Seale H, Williams JH, Kaufman J, Wiley K, Mahimbo A, et al. Policy considerations  
928 for mandatory COVID-19 vaccination from the Collaboration on Social Science and Immunisation.  
929 Medical Journal of Australia. 2021;215(11):499-503.
- 930 69. World Health Organization. Ensuring the integration of refugees and migrants in immunization  
931 policies, planning and service delivery globally. Global Evidence Review on Health and Migration  
932 (GEHM) series. . 2022.
- 933 70. Templeton A, Guven ST, Hoerst C, Vestergren S, Davidson L, Ballentyne S, et al. Inequalities  
934 and identity processes in crises: Recommendations for facilitating safe response to the COVID-19  
935 pandemic. British Journal of Social Psychology. 2020;59(3):674-85.
- 936 71. O'Reilly-de Brún M, de Brún T, Okonkwo E, Bonsenge-Bokanga J-S, De Almeida Silva MM,  
937 Ogbemor F, et al. Using Participatory Learning & Action research to access and engage with 'hard to  
938 reach' migrants in primary healthcare research. BMC Health Services Research. 2016;16(1):25.
- 939 72. Mudyarabikwa O, Regmi K, Ouillon S, Simmonds R. Refugee and Immigrant Community  
940 Health Champions: a Qualitative Study of Perceived Barriers to Service Access and Utilisation of the  
941 National Health Service (NHS) in the West Midlands, UK. Journal of Immigrant and Minority Health.  
942 2022;24(1):199-206.
- 943 73. Rustage K, Crawshaw A, Majeed-Hajaj S, Deal A, Nellums L, Ciftci Y, et al. Participatory  
944 approaches in the development of health interventions for migrants: a systematic review. BMJ Open.  
945 2021;11(10):e053678.
- 946 74. Public Health England. Community champions: A rapid scoping review of community  
947 champion approaches for the pandemic response and recovery. 2021.
- 948 75. Tjilos M, Tamlyn AL, Ragan EJ, Assoumou SA, Barnett KG, Martin P, et al. "Community  
949 members have more impact on their neighbors than celebrities": leveraging community partnerships  
950 to build COVID-19 vaccine confidence. BMC Public Health. 2023;23(1):350.
- 951 76. Crawshaw AF, Kitoko LM, Nkempi SL, Lutumba LM, Hickey C, Deal A, et al. Co-designing a  
952 theory-informed, multicomponent intervention to increase vaccine uptake with Congolese migrants: A  
953 qualitative, community-based participatory research study (LISOLO MALAMU). Health  
954 Expectations.n/a(n/a).
- 955



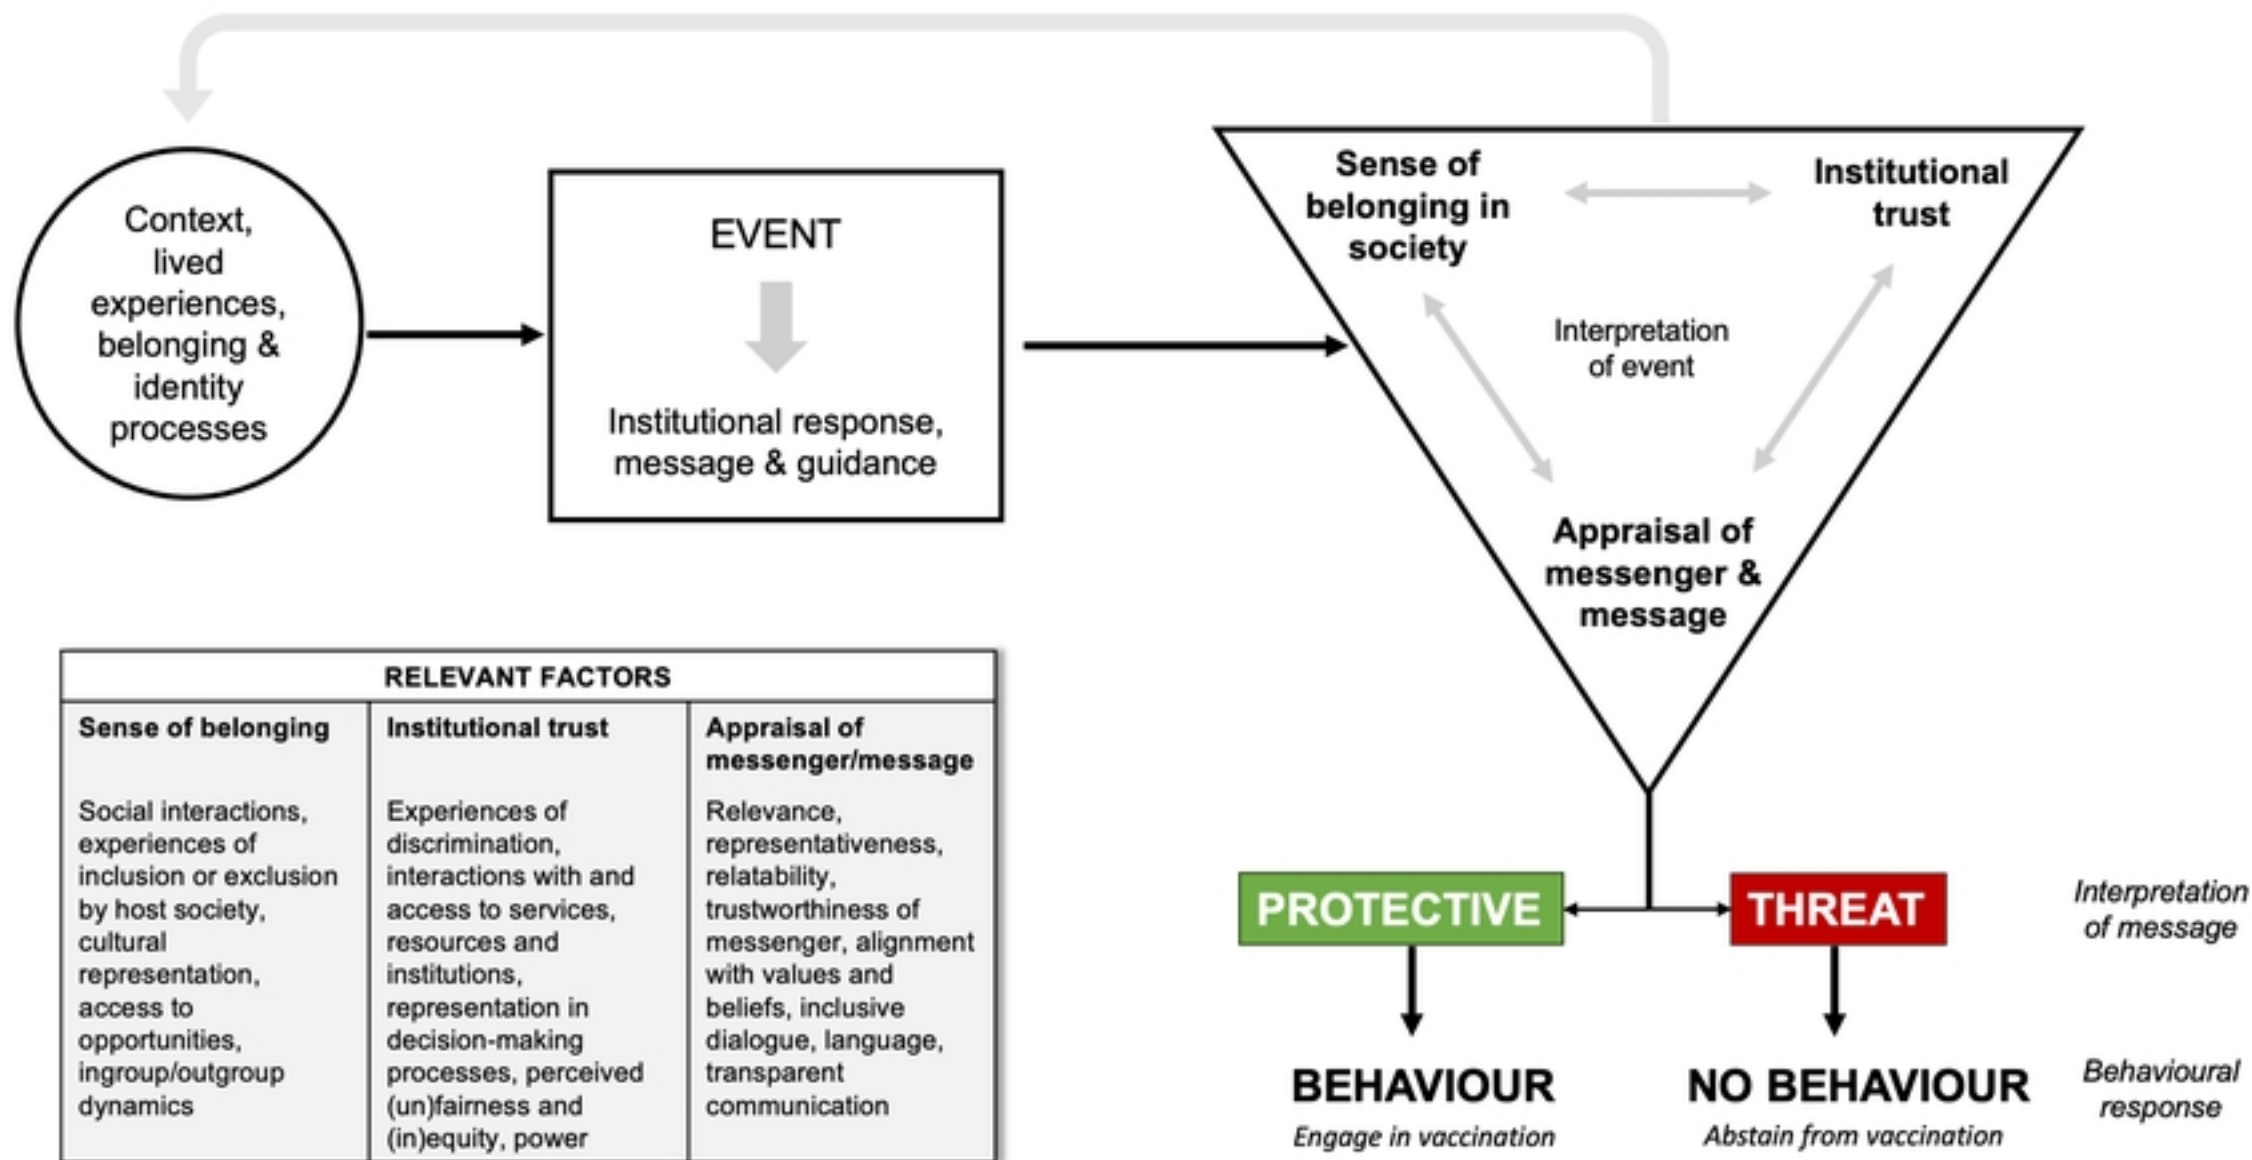

Figure
